1 **Title:** Reduced frontal gamma power at 24 months is associated with better expressive  
2 language in toddlers at risk for autism

3  
4 **Authors:**

5  
6 Carol L. Wilkinson, MD, PhD (Corresponding Author)  
7 Division of Developmental Medicine  
8 Boston Children's Hospital  
9 1 Autumn Street, 6th Floor  
10 Boston, MA 02115  
11 [Carol.wilkinson@childrens.harvard.edu](mailto:Carol.wilkinson@childrens.harvard.edu)

12  
13 April R. Levin, MD  
14 Department of Neurology  
15 Boston Children's Hospital  
16 300 Longwood Avenue, Fegan 11<sup>th</sup> Floor  
17 Boston, Massachusetts, 02115  
18 [April.Levin@childrens.harvard.edu](mailto:April.Levin@childrens.harvard.edu)

19  
20 Laurel J. Gabard-Durnam, PhD  
21 Division of Developmental Medicine  
22 Boston Children's Hospital  
23 1 Autumn Street, 6th Floor  
24 Boston, MA 02115  
25 [Laurel.Gabard-Durnam@childrens.harvard.edu](mailto:Laurel.Gabard-Durnam@childrens.harvard.edu)

26  
27 Helen Tager-Flusberg, PhD  
28 Department of Psychological and Brain Sciences  
29 Boston University  
30 64 Cummington Mall  
31 Boston, Massachusetts, 02215  
32 [htagerf@bu.edu](mailto:htagerf@bu.edu)

33  
34 Charles A. Nelson, PhD  
35 Division of Developmental Medicine  
36 Boston Children's Hospital  
37 1 Autumn Street, 6th Floor  
38 Boston, MA 02115  
39 [Charles\\_nelson@harvard.edu](mailto:Charles_nelson@harvard.edu)

40  
41 **Author Contributions:** CLW was involved in study conception, performed the EEG and  
42 behavioral data analysis, interpreted the data, and drafted the manuscript. ARL and  
43 LJGD contributed to EEG preparation and analysis, and critically revised the manuscript  
44 for intellectual content. HTF and CAN were responsible for the study design, overseeing  
45 data acquisition, and critically reviewed the manuscript for intellectual content.

46

1 **Acknowledgements:** We thank all the families and staff who were involved in this  
2 study. We also thank Adriana Sofia Mendez Leal and Michael Mariscal for contributing  
3 code used in EEG analysis.

4  
5 This research was Support for this work was provided by: The National Institutes of  
6 Health (R01-DC010290 to HTF and CAN; R21 DC 08637 to HTF; 1T32MH112510 to  
7 CLW), Autism Speaks (1323 to HTF), Simons Foundation (137186 to CAN), FRAXA  
8 Research Foundation (CLW), American Brain Foundation (ARL), Autism Science  
9 Foundation (ARL, CLW) and Nancy Lurie Marks Family Foundation (ARL). Statistical  
10 analysis was conducted with support from Harvard Catalyst | The Harvard Clinical and  
11 Translational Science Center (National Center for Advancing Translational Sciences,  
12 National Institutes of Health Award UL1 TR001102) and financial contributions from  
13 Harvard University and its affiliated academic healthcare centers. The content is solely  
14 the responsibility of the authors and does not necessarily represent the official views of  
15 Harvard Catalyst, Harvard University and its affiliated academic healthcare centers, or  
16 the National Institutes of Health. The above funding bodies did not have any role in the  
17 design, collection, analyses, or interpretation of the data or in writing this manuscript.

18  
19 **Conflict of Interest Statement:** The authors declare that they have no conflicts of  
20 interest

1 **ABSTRACT**

2 Gamma oscillations have been associated with early language development in typically  
3 developing toddlers, and gamma band abnormalities have been observed in individuals  
4 with ASD, as well high-risk infant siblings (those having an older sibling with autism), as  
5 early as 6-months of age. The current study investigated differences in baseline frontal  
6 gamma power and its association with language development in toddlers at high versus  
7 low familial risk for autism. EEG recordings as well as cognitive and behavioral  
8 assessments were acquired at 24-months as part of prospective, longitudinal study of  
9 infant siblings of children with and without autism. Diagnosis of autism was determined  
10 at 24-36 months, and data was analyzed across three outcome groups – low risk  
11 without ASD (n=43), high-risk without ASD (n=42), and high-risk with ASD (n=16). High-  
12 risk toddlers *without* ASD had reduced baseline frontal gamma power (30-50Hz)  
13 compared to low-risk toddlers. Among high-risk toddlers increased frontal gamma was  
14 only marginally associated with ASD diagnosis ( $p=0.06$ ), but significantly associated  
15 with reduced expressive language ability ( $p=0.007$ ). No association between gamma  
16 power and language was present in the low-risk group. These findings suggest that  
17 differences in gamma oscillations in high-risk toddlers may represent compensatory  
18 mechanisms associated with improved developmental outcomes.

19

20

21

22

23

## 1 INTRODUCTION

2 Autism spectrum disorder (ASD) is defined by (1) deficits in social communication or  
3 interaction, and (2) restricted or repetitive behaviors(1). However individuals with ASD  
4 are remarkably heterogeneous in their phenotype – both in the presentation of core  
5 symptoms, as well as associated key developmental milestones such as language and  
6 cognitive development. Furthermore, language development of toddlers diagnosed with  
7 ASD can be quite variable, with 30% being minimally verbal by school-age, and roughly  
8 one-quarter developing age-appropriate expressive language skills(2,3). In fact,  
9 language acquisition by the end of preschool is one of the best predictors of later  
10 achievement and functioning(4–8). As such, it is important to identify early brain factors  
11 that not only influence the development of the core symptoms in ASD, but also impact  
12 language development.

13  
14 A goal in improving the functional outcomes of children with autism is to identify those at  
15 greatest risk as early in life as possible, often before the behavioral repertoire of the  
16 infant is sufficiently mature to reveal consistent signs of the disorder. In this context a  
17 great deal of recent attention has been paid to recording the brain’s electrical activity  
18 using electroencephalography (EEG) from infants at high risk for developing autism by  
19 virtue of having an older sibling with the disorder(9–13). EEG measured gamma  
20 oscillations (~30-80Hz) are of particular interest in ASD as they are associated with  
21 higher order cognitive processes including sensory integration, as well as information  
22 and language processing(14–18). In addition, gamma oscillations are modulated by  
23 GABA-ergic inhibitory interneurons, which are implicated in the pathophysiology of ASD

1 and other neurodevelopmental disorders(19–22). Many studies have reported  
2 differences in gamma-band power in older children or adults with ASD compared to  
3 individuals without ASD, however most studies do not examine correlations with clinical  
4 symptoms(23–29), making it difficult to determine whether these differences are primary  
5 causes of impairments, or the result of ongoing compensatory mechanisms. Recent  
6 work in typically developing infants also supports a role for gamma in early language  
7 acquisition and development. For example, by 6 months of age, infants display  
8 increased gamma-band activity in response to native, but not non-native speech(16). In  
9 addition, resting frontal gamma power has been associated with both receptive and  
10 expressive language ability(17,18,30). Work by Benasich et al. has found that resting  
11 frontal gamma power is reduced in toddlers aged 24 and 36 months who have a family  
12 history of language impairment, and that gamma power is positively correlated with  
13 current language ability across a combined population of toddlers with and without  
14 family history of language impairment(17). However, in teenagers, resting gamma is  
15 negatively correlated with measures of reading ability(31), suggesting that the role of  
16 resting gamma oscillations on language processes may be dependent on the age of the  
17 individual.

18  
19 Longitudinal studies following infants at increased risk of ASD provide us the  
20 opportunity to further tease apart the functional significance of these neurophysiological  
21 differences. Infant siblings of children with ASD have an increased incidence of ASD  
22 diagnosis, currently estimated to be as high as 1 in 5(32). Accumulating research  
23 suggests that there are significant neurobiological differences, including gamma

1 oscillations, in these high-risk infant siblings (as compared to siblings of typically  
2 developing children) that are present well before symptom onset, and even among high-  
3 risk infants who do not later develop ASD<sup>11,13,28–35</sup>. For example, our group reported that  
4 at both 3 and 6 months of age, high-risk infants, regardless of their later diagnosis,  
5 show reduced frontal EEG power across many frequencies(13,41). With regards to  
6 gamma oscillations, our lab using a subset of the data presented in this paper, found  
7 differences between low and high-risk groups in the baseline frontal gamma power  
8 developmental trajectory(13) – the high-risk group had lower frontal gamma power at 6  
9 months of age, but had similar gamma power by 24 months. This previous analysis  
10 however did not separate the high-risk group by ASD outcome, and did not correlate  
11 gamma power differences with concurrent or future language measures.

12  
13 In the present study we address three aims. First, using an expanded data set, we  
14 assessed whether baseline frontal gamma power at 24 months is altered between three  
15 outcome groups – low-risk without ASD (LR), high-risk without ASD (HR-NoASD), and  
16 high-risk with ASD (HR-ASD). Second, we assessed whether frontal gamma power at  
17 24 months was associated concurrent or future language ability, and whether these  
18 brain-behavior associations were different between outcome groups. Finally, given the  
19 mounting evidence that the pathophysiology and phenotype of ASD may be different  
20 between males and females, we investigated within-group differences between sexes  
21 and present data both combined and stratified by sex.

## 22 23 **MATERIALS/SUBJECTS AND METHODS**

1 **Participants:** Infants were enrolled in a comprehensive longitudinal study of early  
2 neurocognitive development of infant siblings of children with ASD, conducted at Boston  
3 Children's Hospital/Harvard Medical School and Boston University. Institutional review  
4 board approval was obtained from Boston University and Boston Children's Hospital  
5 (#X06-08-0374) prior to starting the study. Written, informed consent was obtained from  
6 all parents or guardians prior to their children's participation in the study.

7  
8 All infants had a minimum gestational age of 36 weeks, no history of prenatal or  
9 postnatal medical or neurological problems, and no known genetic disorders (e.g.,  
10 fragile-X, tuberous sclerosis). Furthermore, all infants were from primarily English-  
11 speaking households (English spoken more than 75% of the time). Infants designated  
12 as high-risk for ASD (HR) were defined by having at least one full sibling with a DSM-IV  
13 ASD diagnosis that could not be attributed to a known genetic disorder. All older siblings  
14 had a community diagnosis of ASD, and in the majority of cases this was confirmed  
15 using the Social Communication Questionnaire (SCQ)(42) and/or the Autism Diagnostic  
16 Observation Schedule (ADOS)(43). Three older siblings were under the age of 4, and  
17 the Pervasive Developmental Disorders Screening Test-II (PDDST-II)(44) was used  
18 instead of the SCQ. Five older siblings did not have an SCQ or ADOS completed,  
19 however they were all diagnosed in specialty clinics with expertise in ASD evaluation.

20  
21 Low-risk infants were defined by having a typically developing older sibling and no first-  
22 or second-degree family members with ASD. In the majority of cases the siblings of LR  
23 infants were screened for ASD (67/72) using the SCQ or PDD-ST-II, followed by the

1 ADOS if concerns of ASD were raised.

2

3 A total of 255 participants were enrolled in the study. Given the longitudinal nature of  
4 the study and enrollment at an early age, 16 participants were excluded after enrollment  
5 as additional information was gathered and children no longer met our inclusion or  
6 exclusion criteria. In addition, 3 participants were excluded due to medical reasons that  
7 occurred during the study (diagnosis of hearing impairment, seizures, and genetic  
8 finding associated with developmental delays).

9

10 Only a portion of the enrolled participants had high quality EEG recorded at the 24-  
11 month time point, and were therefore included in the analysis of this study. In addition,  
12 three low-risk males went on to meet criteria for ASD and were not included in further  
13 analysis. Ultimately 43 LR and 58 HR toddlers were included in the analysis. Of the 58  
14 HR toddlers, 16 (27.6%) met criteria for ASD (Table 1).

15

16 **Behavioral Assessment:** The Mullen Scales of Early Learning (MSEL) were  
17 administered at 6, 12, 18, 24, and 36 months of age by trained examiners. Age-  
18 standardized T-scores in four domains (receptive language, expressive language, fine  
19 motor, and visual reception) were used to assess development. The ADOS was  
20 administered at 18, 24, and 36 months of age by research staff with extensive  
21 experience in testing children with developmental disorders, and then co-scored by an  
22 ADOS-reliable research assistant via video recording. For those children meeting  
23 criteria on the ADOS, or coming within 3 points of cutoffs, a Licensed Clinical



1 Psychologist reviewed video recordings of behavioral assessments and scores, and  
2 provided a best estimate clinical judgment: typically developing, ASD, or non-spectrum  
3 disorder (e.g. ADHD, anxiety, language concerns). For this analysis, HR infants  
4 receiving a clinical judgment of either typically developing or non-spectrum disorders  
5 were classified as HR-NoASD, and those receiving a clinical judgment of ASD were  
6 classified as HR-ASD. All infants classified as HR-ASD were administered an ADOS at  
7 24 and/or 36 months. Calibrated severity scores for the 24-month ADOS were  
8 determined to allow for comparison between individuals administered different ADOS  
9 modules.

10

11 **EEG Assessment:** Baseline EEG data were collected at 24 months of age in a dimly lit,  
12 sound-attenuated, electrically shielded room. The infant was held by their seated  
13 caregiver during data collection while a research assistant ensured the infant remained  
14 calm and still by blowing bubbles and/or showing toys. Continuous EEG was recorded  
15 for 2-5 minutes. EEG data were collected using either a 64-channel Geodesic Sensor  
16 Net System or a 128-channel Hydrocel Geodesic Sensor Nets (Electrical Geodesics,  
17 Inc., Eugene, OR, USA) connected to a DC-coupled amplifier (Net Amps 200 or Net  
18 Amps 300, Electrical Geodesics Inc.). There was no difference in distribution of net type  
19 between outcome groups ( $X^2_4 = 1.912$ ,  $p=0.38$ ). Data were sampled at either 250 Hz or  
20 500 Hz and referenced to a single vertex electrode (Cz), with impedances kept below  
21 100k $\Omega$ . Electrooculographic electrodes were removed to improve the infant's comfort  
22 during data collection.

23

1 **EEG pre-processing:** The continuous, non-task related EEG portion of the raw  
2 NetStation (EGI, Inc, Eugene, OR) files were exported to MATLAB (versionR2017a) for  
3 pre-processing and subsequent power analysis. All files were batch processed using  
4 the Batch EEG Automated Processing Platform (BEAPP -  
5 <https://github.com/lcnbeapp/beapp>) to ensure uniform analysis regardless of when the  
6 EEG was acquired or which risk group they were in. A 1-Hz high-pass filter and 100Hz  
7 low-pass filter were applied. Data sampled at 500 Hz were resampled using  
8 interpolation to 250 Hz. Both experimental and participant-induced artifacts were then  
9 identified and removed using the Harvard Automated Preprocessing Pipeline for EEG  
10 (HAPPE), a MATLAB based pre-processing pipeline optimized for developmental data  
11 with short recordings and/or high levels of artifact, to automate pre-processing and  
12 artifact removal, and to evaluate data quality in the processed EEGs(45). While  
13 historically artifact removal has largely been accomplished through visual inspection,  
14 more recently the field has moved to more automated techniques that are less prone to  
15 human error and subjectivity, and allow for increased retention in data for analysis.  
16 HAPPE has been shown to both reject a greater proportion of artifact while  
17 simultaneously preserving underlying signal relative to manual editing. HAPPE also  
18 provides data output quality measures that can be used to systematically reject poor  
19 quality data unfit for further analyses. HAPPE artifact identification and removal includes  
20 removing 60Hz line noise, bad channel rejection, and participant produced artifact (eye  
21 blinks, movement, muscle activity) through wavelet-enhanced independent component  
22 analysis (ICA) and MARA (Multiple Artifact Rejection Algorithm)(46,47). MARA was, in  
23 part, chosen for its excellent detection and removal of muscle artifact components which

1 can affect gamma signal(45,46). The following channels, in addition to the 10-20  
2 electrodes, were used for MARA: 64-channel net – 2, 3, 8, 9, 12, 16, 21, 25, 50, 53, 57,  
3 58; 128-channel net – 3, 4, 13, 19, 20, 23, 27, 28, 40, 41, 46, 47, 75, 98, 102, 103, 109,  
4 112, 117, 118, 123, After artifact removal using HAPPE, data were re-referenced to an  
5 average reference. Data were then detrended using the signal mean, and then regions  
6 of high-amplitude signal (>40  $\mu$ V was used to account for the reduce signal amplitude  
7 post HAPPE processing) were removed prior to segmenting the remaining data into 2-  
8 second windows to allow for power calculations using multitaper spectral analysis(48).  
9 Non-continuous data were not concatenated.

10  
11 **EEG power analysis:** A multitaper fast Fourier transform, using three orthogonal  
12 tapers(49) was used to calculate a power spectrum on each segment for the following  
13 frontal electrodes: 64-channel net – 2, 3, 8, 9, 12, 13, 58, 62.; 128-channel net – 3, 4,  
14 11, 19, 20, 23, 24, 27, 118, 123, 124 (Supplemental Figure 1). For each individual EEG  
15 and each electrode, the average power across all two-second segments was then  
16 calculated for the gamma band, defined as [30-50Hz]. Gamma power was then  
17 averaged across the listed electrodes for each individual to obtain their average frontal  
18 gamma power. Here we report absolute power values, normalized by a log 10  
19 transform.

20  
21 **EEG rejection criteria:** EEGs were rejected if they had fewer than 20 segments (40  
22 seconds of total EEG), or were more than 3 standard deviations from the mean on the  
23 following HAPPE data quality output parameters: percent good channels (< 82%), mean

1 retained artifact probability (<0.3), median retained artifact probability (<0.35), percent of  
2 independent components rejected (<84%), and percent variance retained after artifact  
3 removal (>32%). Based on the above criteria, 8 of the 148 EEGs collected at 24 months  
4 were rejected. Additionally, any EEG with a mean gamma power greater or less than  
5 two SD from their outcome group mean were reviewed blind to outcome group, leading  
6 to two additional 24 month EEGs to be rejected. Furthermore, within the remaining data  
7 set, HAPPE data quality output parameters were not significantly correlated (Pearson's  
8 r values ranged from -0.16 to 0.1) with mean frontal gamma power, supporting  
9 adequate removal of muscle artifact by HAPPE. We have also previously shown that  
10 the distribution of each of the above HAPPE data quality output parameters are similar  
11 across the three outcome groups(45).

12  
13 **Statistical Analyses:** In Tables 1 and 2 all categorical variables are presented as  
14 frequencies and percentages, and continuous variables are presented as means and  
15 standard deviations. A Fisher-exact test was used to characterize differences in  
16 demographic data between groups. All continuous variables within each outcome group  
17 were normally distributed using the Shapiro-Wilks test. Two-way ANOVA, followed by  
18 post-hoc Bonferroni tests for multiple comparisons, were used to determine effects of  
19 group, sex, and group x sex interactions on head circumference, MSEL scores, ADOS  
20 calibrated severity scores, and frontal gamma power.

21  
22 Logistic regression was used to determine whether frontal gamma power was  
23 associated with ASD diagnosis. Multivariate linear regression was used to characterize

1 the relationship between frontal gamma power and MSEL language scores at 24 and 36  
2 months. Multiple comparisons within models were adjusted for using False Discovery  
3 Rate.

4  
5 All reported P values are two-tailed, with a P value of 0.05 indicating statistical  
6 significance. Analyses were performed using Stata software, version 14.2 (Stata).  
7 Figures were created using Python 2.7 and python data visualization libraries  
8 (*matplotlib*(50) and *Seaborn* (<https://seaborn.pydata.org/index.html>)).

## 11 **RESULTS**

### 12 **Sample Description**

13 The demographic data for each outcome group (LR, HR-NoASD, and HR-ASD) are  
14 provided in Table 1. While there was no significant difference in proportion of males  
15 between groups, there were more than twice as many male HR-ASD than female HR-  
16 ASD toddlers. There was a significant group difference in maternal, but not paternal  
17 education, with a higher proportion of mothers with less than a college degree in the  
18 HR-NoASD and HR-ASD groups compared to the LR group. There were no differences  
19 in household income, race, or ethnicity. Notably, the majority of participants were white  
20 with household income above \$75,000.

### 22 **Head Circumference**

1 Given recent reports of increased head circumference and early brain overgrowth in  
2 ASD populations, we examined whether there were differences in head circumference  
3 at 24 months within our sample population. There were no differences in head  
4 circumference between groups, however there were expected differences between  
5 males and females, with females having smaller head sizes in all groups ( $F(1,93) =$   
6  $12.68, p=.0006$ ). There was no effect of group or group  $\times$  sex interactions on head  
7 circumference (Table 2).

8

### 9 **Group and Sex differences in Developmental Profiles**

10 We next examined group (LR, HR-NoASD, HR-ASD) and sex differences, as well as  
11 possible within-group sex differences on the MSEL subscales (Expressive and  
12 Receptive Language, Fine Motor, and Visual Reception). Given differences in maternal  
13 education between groups at this time point, maternal education was included in the  
14 model as a covariate. There was a significant main effect of group on Expressive  
15 Language, and a significant interaction between effects of sex and group on Receptive  
16 Language (Table 2, Figure 1). Specifically, HR-ASD toddlers had significantly lower  
17 MSEL Expressive T-scores compared to LR toddlers ( $p=0.02$ , Bonferroni). For  
18 Receptive Language, further post-hoc analyses found significant group differences for  
19 females but not males ( $p<0.005$ , Bonferroni), and that females in the HR-ASD group  
20 had lower Receptive Language T-scores compared to males ( $p=0.01$ , Bonferroni).  
21 There were no effects of group or sex, or interaction effects of group and sex, on Fine  
22 Motor or Visual Reception measures.

23

1 Next we examined sex differences in ASD symptoms at 24 months, using the ADOS  
2 severity score as the dependent variable and group, sex, and group×sex interactions as  
3 independent variables (Table 2). To control for possible confounding of language ability  
4 on ADOS severity, MSEL Expressive and Receptive Language T-Scores were included  
5 as covariates. There was a significant interaction between the effects of sex and group.  
6 Post-hoc analyses showed that both male and female HR-ASD toddlers had  
7 significantly increased severity scores compared to their respective counterparts in the  
8 LR group ( $p=0.006$ ;  $p<0.001$ , Bonferroni). In addition, HR-ASD females had significantly  
9 increased severity scores compared to HR-NoASD females ( $p<0.001$ ), however HR-  
10 ASD males had only marginally significant increased severity scores compared to HR-  
11 NoASDs males ( $p=0.06$ ). In line with this, HR-ASD females had significantly higher  
12 ADOS severity scores compared to HR-ASD males ( $p=0.005$ ).

13  
14 Overall, in this study sample, high-risk females with ASD had the lowest expressive and  
15 receptive language scores, and highest ADOS severity scores. No differences between  
16 groups were observed for measures of Fine Motor and Visual Reception skills.

17

### 18 **Frontal Gamma Power**

19 Next we asked whether there were group or sex differences in baseline frontal gamma  
20 power at 24 months of age. We hypothesized that the HR-ASD group would have  
21 significantly different frontal gamma power compared to LR and HR-NoASD groups.  
22 Two-way ANOVA was used determine whether there were effects of outcome group or  
23 sex, as well as possible group×sex interactions, on mean frontal gamma power. Given

1 differences in head circumference between sexes, and differences in maternal  
2 education between groups, both were included as covariates.  
3  
4 A main effect of outcome group was present ( $F_{2,80}=4.73$ ,  $p=0.01$ ; Figure 2), however,  
5 contrary to our expectations, we found this was not due to HR-ASD differences, but  
6 rather reduced gamma power in the HR-NoASD group when compared to LR controls  
7 ( $p=0.013$ , Bonferroni). There was no difference between males and females, and no  
8 significant group $\times$ sex interactions.

9  
10 This finding suggests that *within* a high-risk population, increased frontal gamma at 24  
11 months of age may be associated with ASD diagnosis. However, within the high-risk  
12 population frontal gamma power was only marginally associated with ASD diagnosis in  
13 a logistic-regression model that adjusted for sex and maternal education (odds ratio per  
14 1-SD increase in frontal gamma power, 2.1; 95% CI, 0.98 to 4.6,  $p=0.06$ ). In addition  
15 this association was further reduced when MSEL Verbal Quotient was added as a  
16 covariate (odds ratio, 1.5, 95% CI, 0.6 to 3.48,  $p=0.4$ ), emphasizing the strong known  
17 relationship between ASD diagnosis and language skills.

18

### 19 **Frontal Gamma and Concurrent MSEL Language Scores**

20 The close relationship between language and ASD outcome creates challenges in  
21 identifying neural correlates that are specific to ASD. Do aberrant gamma  
22 measurements in ASD populations represent brain changes that are specific to ASD, or  
23 do they represent highly associated developmental phenotypes, such as language



1 delay or cognitive challenges, that are not core features of ASD? In the present study's  
2 sample population, reduced frontal power across multiple frequency bands is observed  
3 at 3 months of age in the high risk group, well before ASD symptoms are present(41),  
4 and remain reduced in the HR-NoASD, but not the HR-ASD group at 24 months of age.  
5 This suggests that aberrant gamma oscillations may not be specific to ASD outcome,  
6 but a broader developmental process. To investigate this further, we next asked  
7 whether the relationships between frontal gamma power and MSEL language scores  
8 are different between risk and outcome groups.

9  
10 Initially, using simple, unadjusted, Pearson correlations (Figure 3) between risk groups,  
11 we found in high-risk toddlers that frontal gamma power was negatively correlated with  
12 MSEL Expressive ( $r = -0.24$ ,  $p=0.01$ ,  $n=54$ ), but not Receptive T-scores ( $r=-0.2$ ,  $p=0.15$ ,  
13  $n=54$ ). No correlation between gamma and language scores was observed in low risk  
14 toddlers (Expressive:  $r=0.01$ ,  $p=0.94$ , Receptive:  $r=0.04$ ,  $p=0.8$ ;  $n=43$ ). When the high-  
15 risk group was divided into outcome groups, this negative correlation between frontal  
16 gamma and expressive language was maintained in the HR-NoASD group ( $r=-0.31$ ,  
17  $p=0.05$ ,  $n=39$ ). A similar, but not significant trend was observed in the HR-ASD group.

18  
19 In order to evaluate further the effect of risk and outcome group on the relationship  
20 between frontal power and expressive language, as well as to describe any within-group  
21 differences between males and females, two linear regression models were further  
22 examined, using MSEL Expressive T-Score as the dependent variable. Model 1  
23 (Adjusted  $R^2 = 0.16$ ) included both two-way and three-way interactions between risk

1 (low versus high risk), sex, and frontal gamma. Model 2 (Adjusted  $R^2 = 0.17$ ) included  
2 both two-way and three-way interactions between outcome group (LR, HR-NoASD, HR-  
3 ASD), sex, and frontal gamma. Three-way interactions for both models had p-values  
4 less than 0.25 and were therefore retained (Table 3). Both models also included head  
5 circumference and maternal education as covariates given their differences between  
6 sex and group respectively within our data set. In order to specifically evaluate the  
7 relationship between MSEL Expressive Language T-scores and frontal gamma power  
8 within risk or outcome subgroups, a marginal effects analysis was conducted and  
9 slopes are presented in Table 3.

10

#### 11 *Model 1*

12 Slope comparisons of subgroups from Model 1 revealed that high-risk toddlers showed  
13 a significant negative effect of frontal gamma power on expressive language T-scores  
14 (unadjusted  $p=0.007$ ; adjusted  $p=0.014$ ), while low risk toddlers did not. However, the  
15 effect of frontal gamma power on MSEL Expressive T-Scores was not significantly  
16 different between risk groups. Risk groups were further subdivided by sex to evaluate  
17 whether the effect of frontal gamma on MSEL Expressive Language T-scores was  
18 similar between males and females. There was no significant difference between males  
19 and females.

20

#### 21 *Model 2*

22 Slopes of MSEL Expressive T-scores versus Frontal Gamma Power from Model 2 are  
23 also shown in Table 3. However given the small number of participants in HR-ASD

1 group, these results should be interpreted with caution. Between outcome groups, HR-  
2 ASD toddlers had the strongest negative association (unadjusted  $p=0.04$ , adjusted  
3  $p=0.12$ ). However, the effect was not significantly different from LR or HR-NoASD  
4 groups. When groups were further subdivided by sex, the strongest negative  
5 relationship between frontal gamma and expressive language were observed in HR-  
6 NoASD Females and HR-ASD Males (Table 3, See Supplemental Figure 2 for  
7 scatterplots).

### 9 **Frontal Gamma and Future MSEL Language Scores**

10 Finally we assessed associations between frontal gamma power at 24 months and later  
11 language ability at 36 months (Table 3). In this third model (Adjusted  $R^2 = 0.19$ ), LR and  
12 HR-ASD groups significantly differed in their associations ( $F_{1,53} = 4.36$ ,  $p=0.04$ ), with the  
13 LR group having a positive association, and the HR-ASD having a negative association.  
14 When groups were subdivided by sex, a stronger positive association between frontal  
15 gamma power and later language scores was observed in LR females (slope 40.7,  
16  $p=0.02$ , CI 6.3 to 75.0) compared to LR males (slope -4.35,  $p=0.86$ , CI -52.3 to 43.6).

## 18 **DISCUSSION**

19 Here we report that at 24 months of age, resting frontal gamma power was significantly  
20 reduced in high-risk toddlers *without* ASD compared to low-risk controls; however, no  
21 difference was observed between high-risk toddlers *with* ASD and low-risk controls,  
22 suggesting that the single measure of resting gamma power is not a useful biomarker of  
23 ASD – at least at 24 months. Furthermore, higher gamma power in the high-risk group

1 was only marginally associated with ASD outcome ( $p=0.06$ ), and this association was  
2 not maintained when language ability was added as a covariate, emphasizing the strong  
3 linkage between ASD diagnosis and language skills.

4  
5 Our lab's previous longitudinal analysis from a smaller subset of this study population  
6 found that high-risk infants (collapsed across ASD outcome) at 6 months had lower  
7 power across all frequency bands, but by 24 months gamma power was similar  
8 between high- and low-risk infants(13). Our new finding that HR-NoASD toddlers have  
9 reduced frontal gamma power at 24 months supports a role for early neural  
10 compensatory mechanisms impacting ASD outcome. One possibility is that  
11 *maintenance* of reduced frontal gamma across the first two years may be a marker of  
12 improved developmental outcome.

13  
14 In support of this hypothesis, low frontal gamma power was associated with better  
15 language ability in the high-risk toddlers. However, there was no such association in the  
16 low-risk group. Interestingly, in a similar age group, Benasich et al. have reported  
17 reduced frontal gamma in toddlers with familial risk for language impairment. However  
18 they did not evaluate the association between gamma and language function within this  
19 subset of children, rather they found gamma to be positively correlated with language  
20 *across* a larger sample which combined participants both with and without familial risk of  
21 language impairment (17,18). In our study we only observed this positive relationship in  
22 LR females when comparing frontal gamma power at 24 months to MSEL Expressive  
23 Language scores at 36 months. While Benasich et al. had similar numbers of males and

1 females in their enrolled population, only a subset had EEG and behavioral data, and  
2 the breakdown of males versus females for each age group analyzed was not reported.  
3 Our data suggests that sex may play an important role in this relationship.

4

## 5 **Gamma and Language**

6 Why would reduced gamma in a high-risk population be associated with improved  
7 language ability? Gamma oscillations are associated with a variety of higher order  
8 cognitive processes including language(16,51), attention(52,53), and working  
9 memory(54,55). However, gamma oscillations also indirectly represent the balance  
10 between excitatory and inhibitory neurons. Gamma oscillations in the cortex are  
11 generated by parvalbumin (PV) inhibitory interneurons, however disruption in PV  
12 interneurons in rodents has been shown to both increase and decrease spontaneous  
13 gamma power(56). Decreased gamma oscillations in the context of aberrant  
14 neurocircuitry may represent a variety of functions including successful compensation  
15 for processes that may increase gamma oscillations such as PV hypofunction.  
16 Alternatively, increased gamma in already abnormal neurocircuitry may lead to a ceiling  
17 effect, preventing further increase in gamma during cognitive processes. In this case,  
18 reduced gamma power would provide a more pliable system for learning. Teasing this  
19 out further is a challenging task. Longitudinal analysis of baseline gamma focused on  
20 differences between both group, and sex within group, will be useful. In addition, future  
21 studies evaluating the relationship between baseline gamma and evoked gamma within  
22 outcome groups, and how this relates to language will improve our understanding of the  
23 developmental role of gamma oscillation within high-risk populations.

1

## 2 **Sex Differences**

3 Given the growing evidence of sex differences in early brain development and plasticity  
4 in ASD(57–61), in addition to differences in prevalence and phenotype between sexes,  
5 this study closely examined any possible within-group sex differences. Prospective  
6 studies of familial high-risk infants provide a unique opportunity to investigate possible  
7 compensatory mechanisms that “protect” females from ASD. Given our limited sample  
8 size, strong conclusions cannot be made with regard to sex differences. However  
9 presenting and evaluating data sub-grouped by sex is important for building hypotheses  
10 for future studies. In this study, female high-risk toddlers with ASD (n=5) had  
11 significantly lower receptive language skills than their male counterparts, and increased  
12 ADOS severity scores. Reduced IQ in females with ASD has been observed by several  
13 other groups(62,63), however others, specifically investigating high-risk infants in a  
14 larger sample size than this study, did not observe within-group sex differences in  
15 cognitive functioning or ASD symptoms severity(64). In this study, there were no  
16 significant differences between males and females across outcome groups in frontal  
17 gamma power at 24 months. However, when individual data points are examined, high-  
18 risk females make up a larger proportion of the lowest quartile of mean frontal gamma  
19 power (Figure 2). Furthermore, when the high-risk group is further separated by ASD  
20 outcome, it is the HR-NoASD females and HR-ASD males that have the strongest  
21 negative relationship between frontal gamma power and language ability. One possible  
22 explanation for this similarity is that these two subgroups have the greatest similarities  
23 in underlying neurobiology. While few studies have focused on genetic risk factors in

1 *unaffected* high-risk females, the increased genetic burden observed in females with  
2 ASD suggests that at least a portion of unaffected high-risk females have a genetic  
3 burden similar to that seen in affected males, but do not develop ASD symptoms.

4

## 5 **Limitations**

6 This study has several limitations. Given the longitudinal nature of the study, EEG  
7 acquisition changed over the course of the study. Two types of nets were utilized and  
8 EEGs were collected at two sampling rates. Given this variation we utilized batch pre-  
9 processing methods and artifact removal specific for infant EEG data to reduce any  
10 additional differences in data analysis. In addition, analyzed electrodes for each net type  
11 were carefully selected using EGI published reports(65) to ensure the same regions of  
12 interest were represented for each net type. A second limitation is that while this was a  
13 large study, enrolling over 100 HR infants, our sample size of HR-ASD toddlers with  
14 high quality EEG data at 24 months was small (n = 16), limiting our statistical power  
15 within this group. Finally, it should be noted that our participants, including those  
16 diagnosed with ASD, generally had age-appropriate language abilities. Limited  
17 variability of language skills within groups may have hindered our ability to observe  
18 statistically significant associations.

19

## 20 **Conclusions**

21 We found that high-risk toddlers *without* ASD have reduced baseline frontal gamma  
22 activity, and that within this study's high-risk population low frontal gamma power was  
23 associated with better language ability. Furthermore, this negative association between

1 gamma power and language was largely driven by the high-risk females, emphasizing  
2 the importance of sex subgroup analysis. Together these findings suggest that gamma  
3 oscillations at this age may represent the result of ongoing compensatory mechanisms.  
4 To better understand the role of gamma oscillations in ASD, we must disentangle  
5 longitudinal compensatory changes in neural circuitry from core features of brain  
6 dysfunction. This requires both longitudinal analysis of high-risk populations, starting  
7 very early in life, as well as continued investigation into the relationship between  
8 baseline and evoked gamma oscillations throughout the course of early development.

9

## 10 **ABBREVIATIONS**

11 ADHD: Attention Deficit Hyperactivity Disorder  
12 ADOS: Autism Diagnostic Observation Schedule  
13 ASD: Autism Spectrum Disorder  
14 BEAPP: Batch EEG Automated Processing Platform  
15 EEG: Electroencephalography  
16 HAPPE: Harvard Automated Preprocessing Pipeline for EEG  
17 HR-ASD: High-risk with ASD  
18 HR-NoASD: High-risk without ASD  
19 LR: Low-risk without ASD  
20 MARA: Multiple Artifact Rejection Algorithm  
21 MSEL: Mullen Scales of Early Learning  
22 PDDST-II: Pervasive Developmental Disorders Screening Test-II  
23 PV: parvalbumin  
24 SCQ: Social Communication Questionnaire

25

26

## 27 **References**

28 1. American Psychiatric Association. Diagnostic and Statistical Manual of Mental  
29 Disorders (5th ed.). American Psychiatric Association. Arlington, VA: American  
30 Psychiatric Publishing.; 2013. 991 p.



- 1 2. Anderson DK, Lord C, Risi S, DiLavore PS, Shulman C, Thurm A, et al. Patterns  
2 of Growth in Verbal Abilities Among Children With Autism Spectrum Disorder. *J*  
3 *Consult Clin Psychol.* 2007;75(4):594–604.
- 4 3. Tager-Flusberg H, Kasari C. Minimally verbal school-aged children with autism  
5 spectrum disorder: The neglected end of the spectrum. Vol. 6, *Autism Research.*  
6 *NIH Public Access;* 2013. p. 468–78.
- 7 4. Billstedt E, Gillberg IC, Gillberg C, Gillberg C. Autism after adolescence:  
8 population-based 13- to 22-year follow-up study of 120 individuals with autism  
9 diagnosed in childhood. *J Autism Dev Disord.* 2005 Jun;35(3):351–60.
- 10 5. Gotham K, Pickles A, Lord C. Trajectories of Autism Severity in Children Using  
11 Standardized ADOS Scores. *Pediatrics.* 2012 Nov 1;130(5):e1278–84.
- 12 6. Miller LE, Burke JD, Troyb E, Knoch K, Herlihy LE, Fein DA. Preschool predictors  
13 of school-age academic achievement in autism spectrum disorder. *Clin*  
14 *Neuropsychol.* 2017 Feb 17;31(2):382–403.
- 15 7. Szatmari P, Bryson SE, Streiner DL, Wilson F, Archer L, Ryerse C. Two-Year  
16 Outcome of Preschool Children With Autism or Asperger’s Syndrome. *Am J*  
17 *Psychiatry.* 2000 Dec;157(12):1980–7.
- 18 8. Szatmari P, Bryson S, Duku E, Vaccarella L, Zwaigenbaum L, Bennett T, et al.  
19 Similar developmental trajectories in autism and Asperger syndrome: from early  
20 childhood to adolescence. *J Child Psychol Psychiatry.* 2009 Dec;50(12):1459–67.
- 21 9. Elsabbagh M, Johnson MH. Getting answers from babies about autism. Vol. 14,  
22 *Trends in Cognitive Sciences.* 2010. p. 81–7.
- 23 10. Elsabbagh M, Mercure E, Hudry K, Chandler S, Pasco G, Charman T, et al. Infant

- 1 neural sensitivity to dynamic eye gaze is associated with later emerging autism.  
2 Vol. 22, Current Biology. 2012. p. 338–42.
- 3 11. Gabard-Durnam L, Tierney AL, Vogel-Farley V, Tager-Flusberg H, Nelson C a.  
4 Alpha Asymmetry in Infants at Risk for Autism Spectrum Disorders. J Autism Dev  
5 Disord. 2015 Feb;45(2):473–80.
- 6 12. Jones EJH, Venema K, Lowy R, Earl RK, Webb SJ. Developmental changes in  
7 infant brain activity during naturalistic social experiences. Dev Psychobiol.  
8 2015;57(7):842–53.
- 9 13. Tierney AL, Gabard-Durnam L, Vogel-Farley V, Tager-Flusberg H, Nelson C a.  
10 Developmental trajectories of resting EEG power: an endophenotype of autism  
11 spectrum disorder. PLoS One. 2012 Jan;7(6):e39127.
- 12 14. Engel AK, Singer W. Temporal binding and the neural correlates of sensory  
13 awareness. Vol. 5, Trends in Cognitive Sciences. 2001. p. 16–25.
- 14 15. Wang X-J. Neurophysiological and Computational Principles of Cortical Rhythms  
15 in Cognition. Physiol Rev. 2010 Jul;90(3):1195–268.
- 16 16. Peña M, Pittaluga E, Mehler J. Language acquisition in premature and full-term  
17 infants. Proc Natl Acad Sci U S A. 2010;107:3823–8.
- 18 17. Benasich A a., Gou Z, Choudhury N, Harris KD. Early cognitive and language  
19 skills are linked to resting frontal gamma power across the first 3 years. Behav  
20 Brain Res. 2008;195:215–22.
- 21 18. Gou Z, Choudhury N, Benasich AA. Resting frontal gamma power at 16, 24 and  
22 36 months predicts individual differences in language and cognition at 4 and 5  
23 years. Behav Brain Res. 2011 Jul;220(2):263–70.

- 1 19. Fatemi SH, Reutiman TJ, Folsom TD, Rustan OG, Rooney RJ, Thuras PD.  
2 Downregulation of GABAA Receptor Protein Subunits  $\alpha 6$ ,  $\beta 2$ ,  $\delta$ ,  $\epsilon$ ,  $\gamma 2$ ,  $\theta$ , and  $\rho 2$   
3 in Superior Frontal Cortex of Subjects with Autism. *J Autism Dev Disord*. 2014  
4 Aug 26;44(8):1833–45.
- 5 20. Gonzalez-Burgos G, Cho RY, Lewis DA. Alterations in Cortical Network  
6 Oscillations and Parvalbumin Neurons in Schizophrenia. *Biol Psychiatry*. 2015  
7 Jun 15;77(12):1031–40.
- 8 21. Lewis DA, Hashimoto T, Volk DW. Cortical inhibitory neurons and schizophrenia.  
9 *Nat Rev Neurosci*. 2005 Apr 1;6(4):312–24.
- 10 22. Robertson CE, Ratai E, Kanwisher N. Reduced GABAergic Action in the Autistic  
11 Brain. *Curr Biol*. 2016 Jan;26(1):80–5.
- 12 23. Rojas DC, Wilson LB.  $\gamma$ -band abnormalities as markers of autism spectrum  
13 disorders. *Biomark Med*. 2014 Mar;8(3):353–68.
- 14 24. Orekhova E V., Stroganova TA, Prokofyev AO, Nygren G, Gillberg C, Elam M.  
15 Sensory gating in young children with autism: Relation to age, IQ, and EEG  
16 gamma oscillations. *Neurosci Lett*. 2008;434(2):218–23.
- 17 25. Orekhova E V., Stroganova TA, Nygren G, Tsetlin MM, Posikera IN, Gillberg C, et  
18 al. Excess of High Frequency Electroencephalogram Oscillations in Boys with  
19 Autism. *Biol Psychiatry*. 2007;62(9):1022–9.
- 20 26. Cornew L, Roberts TPL, Blaskey L, Edgar JC. Resting-State Oscillatory Activity in  
21 Autism Spectrum Disorders. *J Autism Dev Disord*. 2011;42(9):1884–94.
- 22 27. Sheikhan A, Behnam H, Noroozian M, Mohammadi MR, Mohammadi M.  
23 Abnormalities of quantitative electroencephalography in children with Asperger

- 1 disorder in various conditions. *Res Autism Spectr Disord*. 2009;3(2):538–46.
- 2 28. Sheikhan A, Behnam H, Mohammadi MR, Noroozian M, Mohamamadi M.  
3 Detection of abnormalities for diagnosing of children with autism disorders using  
4 of quantitative electroencephalography analysis. *J Med Syst*. 2012;36(2):957–63.
- 5 29. Maxwell CR, Villalobos ME, Schultz RT, Herpertz-Dahlmann B, Konrad K, Kohls  
6 G. Atypical Laterality of Resting Gamma Oscillations in Autism Spectrum  
7 Disorders. *J Autism Dev Disord*. 2013;45(2):292–7.
- 8 30. Brito NH, Fifer WP, Myers MM, Elliott AJ, Noble KG. Associations among family  
9 socioeconomic status, EEG power at birth, and cognitive skills during infancy. *Dev*  
10 *Cogn Neurosci*. 2016;19:144–51.
- 11 31. Tierney A, Strait DL, Kraus N. Resting gamma power is linked to reading ability in  
12 adolescents. *Dev Sci*. 2014 Jan 1;17(1):86–93.
- 13 32. Ozonoff S, Young GS, Carter A, Messinger D, Yirmiya N, Zwaigenbaum L, et al.  
14 Recurrence Risk for Autism Spectrum Disorders: A Baby Siblings Research  
15 Consortium Study. *Pediatrics*. 2011 Aug 15;128(3):488–95.
- 16 33. Bosl W, Tierney A, Tager-Flusberg H, Nelson C. EEG complexity as a biomarker  
17 for autism spectrum disorder risk. *BMC Med*. 2011 Feb 22;9(1):18.
- 18 34. Hazlett HC, Gu H, Munsell BC, Kim SH, Styner M, Wolff JJ, et al. Early brain  
19 development in infants at high risk for autism spectrum disorder. *Nat Publ Gr*.  
20 2017;542(7641):348–51.
- 21 35. Guiraud JA, Kushnerenko E, Tomalski P, Davies K, Ribeiro H, Johnson MH, et al.  
22 Differential habituation to repeated sounds in infants at high risk for autism.  
23 *Neuroreport*. 2011 Nov 16;22(16):845–9.

- 1 36. Keehn B, Wagner JB, Tager-Flusberg H, Nelson C a. Functional connectivity in  
2 the first year of life in infants at-risk for autism: a preliminary near-infrared  
3 spectroscopy study. *Front Hum Neurosci.* 2013 Jan;7(August):444.
- 4 37. Righi G, Tierney AL, Tager-Flusberg H, Nelson CA. Functional connectivity in the  
5 first year of life in infants at risk for autism spectrum disorder: An EEG study.  
6 *PLoS One.* 2014;9(8):1–10.
- 7 38. Seery AM, Vogel-Farley V, Tager-Flusberg H, Nelson C a. Atypical lateralization  
8 of ERP response to native and non-native speech in infants at risk for autism  
9 spectrum disorder. *Dev Cogn Neurosci.* 2013 Jul;5:10–24.
- 10 39. Seery A, Tager-Flusberg H, Nelson CA. Event-related potentials to repeated  
11 speech in 9-month-old infants at risk for autism spectrum disorder. *J Neurodev*  
12 *Disord.* 2014;6(1).
- 13 40. Shen MD, Kim SH, McKinstry RC, Gu H, Hazlett HC, Nordahl CW, et al.  
14 Increased Extra-axial Cerebrospinal Fluid in High-Risk Infants Who Later Develop  
15 Autism. *Biol Psychiatry.* 2017 Aug 1;82(3):186–93.
- 16 41. Levin AR, Varcin KJ, O’Leary HM, Tager-Flusberg H, Nelson CA. EEG power at 3  
17 months in infants at high familial risk for autism. *J Neurodev Disord.* 2017;9(1).
- 18 42. Rutter Bailey, A., & Lord, C. M. *Social Communication Questionnaire.* Los  
19 Angeles, CA: Western Psychological Services; 2003.
- 20 43. Lord C, Rutter M. *Autism Diagnostic Observation Schedule. Second.* Los Angles,  
21 CA: Western Psychological Services; 2012.
- 22 44. Montgomery JM, Duncan CR, Francis GC. *Test Review: Siegel, B. (2004).*  
23 *Pervasive Developmental Disorder Screening Test II (PDDST-II).* San Antonio,

- 1 TX: Harcourt. *J Psychoeduc Assess.* 2007;25:299–306.
- 2 45. Gabard-Durnam LJ, Mendez Leal AS, Wilkinson CL, Levin AR. The Harvard  
3 Automated Processing Pipeline for Electroencephalography (HAPPE):  
4 standardized processing software for developmental and high-artifact data. *Front*  
5 *Neurosci.* 2018;12:97.
- 6 46. Winkler I, Haufe S, Tangermann M. Automatic Classification of Artifactual ICA-  
7 Components for Artifact Removal in EEG Signals. *Behav Brain Funct.* 2011 Aug  
8 2;7(1):30.
- 9 47. Winkler I, Debener S, Muller KR, Tangermann M. On the influence of high-pass  
10 filtering on ICA-based artifact reduction in EEG-ERP. In: *Proceedings of the*  
11 *Annual International Conference of the IEEE Engineering in Medicine and Biology*  
12 *Society, EMBS.* 2015. p. 4101–5.
- 13 48. Babadi B, Brown EN. A review of multitaper spectral analysis. Vol. 61, *IEEE*  
14 *Transactions on Biomedical Engineering.* 2014. p. 1555–64.
- 15 49. Thomson DJ. Spectrum estimation and harmonic analysis. *Proc IEEE.*  
16 1982;70(9):1055–96.
- 17 50. Hunter JD. Matplotlib: A 2D graphics environment. *Comput Sci Eng.*  
18 2007;9(3):99–104.
- 19 51. Mcfadden KL, Hepburn S, Winterrowd E, Schmidt GL, Rojas DC. Abnormalities in  
20 gamma-band responses to language stimuli in first-degree relatives of children  
21 with autism spectrum disorder: an MEG study. *BMC Psychiatry.* 2012;12:1.
- 22 52. Taylor K, Mandon S, Freiwald WA, Kreiter AK. Coherent Oscillatory Activity in  
23 Monkey Area V4 Predicts Successful Allocation of Attention. *Cereb Cortex.* 2005

- 1 Sep 1;15(9):1424–37.
- 2 53. Fries P, Nikolić D, Singer W. The gamma cycle. Trends Neurosci.  
3 2007;30(7):309–16.
- 4 54. Howard MW, Rizzuto DS, Caplan JB, Madsen JR, Lisman J, Aschenbrenner-  
5 Scheibe R, et al. Gamma Oscillations Correlate with Working Memory Load in  
6 Humans. Cereb Cortex. 2003 Dec 1;13(12):1369–74.
- 7 55. Pesaran B, Pezaris JS, Sahani M, Mitra PP, Andersen RA. Temporal structure in  
8 neuronal activity during working memory in macaque parietal cortex. Nat  
9 Neurosci. 2002 Aug 22;5(8):805–11.
- 10 56. Sohal VS. Insights into cortical oscillations arising from optogenetic studies. Biol  
11 Psychiatry. 2012 Jun 15;71(12):1039–45.
- 12 57. Kim KC, Kim P, Go HS, Choi CS, Park JH, Kim HJ, et al. Male-specific alteration  
13 in excitatory post-synaptic development and social interaction in pre-natal valproic  
14 acid exposure model of autism spectrum disorder. J Neurochem.  
15 2013;124(6):832–43.
- 16 58. Lai MC, Lerch JP, Floris DL, Ruigrok AN V, Pohl A, Lombardo M V., et al. Imaging  
17 sex/gender and autism in the brain: Etiological implications. J Neurosci Res.  
18 2017;95(1–2):380–97.
- 19 59. Mottron L, Duret P, Mueller S, Moore RD, Forgeot d’Arc B, Jacquemont S, et al.  
20 Sex differences in brain plasticity: a new hypothesis for sex ratio bias in autism.  
21 Mol Autism. 2015;6(1):33.
- 22 60. Werling DM. The role of sex-differential biology in risk for autism spectrum  
23 disorder. Biol Sex Differ. 2016;7(1):58.

- 1 61. Baron-Cohen Simon S. Empathizing, systemizing, and the extreme male brain  
2 theory of autism. Prog Brain Res. 2010;186(C):167–75.
- 3 62. Volkmar F, Szatmari P, Sparrow S. Sex differences in pervasive developmental  
4 disorders. J Autism Dev Disord. 1993;23(4):579–91.
- 5 63. Lord C, Schopler E, Revicki D. Sex differences in autism. J Autism Dev Disord.  
6 1982;12(4):317–30.
- 7 64. Messinger DS, Young GS, Webb SJ, Ozonoff S, Bryson SE, Carter A, et al. Early  
8 sex differences are not autism-specific: A Baby Siblings Research Consortium  
9 (BSRC) study. Mol Autism. 2015;6:32.
- 10 65. Luu P, Ferree T. Determination of the HydroCel Geodesic Sensor Nets' Average  
11 Electrode Positions and Their 10 – 10 International Equivalents.

## 12 **FIGURE LEGENDS**

13 **Figure 1. Mullen Scales of Early Learning T-Scores.** Violin plots of T-scores from  
14 each of the 4 subscales (Expressive Language, Receptive Language, Fine motor, and  
15 Visual Reception) are shown for each outcome group, divided into males and females.  
16 Lines represent individual data points. LR (n: males = 24, females 19), HR-NoASD (n;  
17 males 18-19, females 20-21); HR-ASD (n: males 10, females 5).

18

19 **Figure 2. Frontal Gamma Power reduced in HR-NoASD Group.** Box plots of Frontal  
20 Gamma Power are shown for each outcome group. Individual data points for males  
21 (left) and females (right) are also shown for each group. Mean values: LR (n=43,  
22  $1.31 \pm 0.12$ ); HR-NoASD (n=42,  $1.22 \pm 0.14$ ); HR-ASD (n = 16,  $1.30 \pm 0.16$ ). Two-way  
23 ANOVA test, controlling for head circumference and maternal education, showed main



1 effect of group ( $F_{2,80}=4.73$ ,  $p =0.01$ ) with reduced frontal gamma in HR-NoASD group  
2 compared to LR group (Bonferroni,  $p=0.013$ ).

3

#### 4 **Figure 3. Frontal Gamma Power and Mullen Scales of Early Learning Language**

5 **Scores.** Frontal gamma is negatively correlated with the Mullen Verbal Quotient score  
6 for high-risk toddlers (HR-ALL), but not low-risk toddlers (LR). When divided into  
7 language subscales, this negative correlation was only significant for Expressive, but  
8 not Receptive Language T-scores. When further divided into outcome groups, only  
9 high-risk toddlers without autism (HR-NoASD) showed significant negative correlation  
10 between frontal gamma and expressive language T-scores.

11

# Figure 1

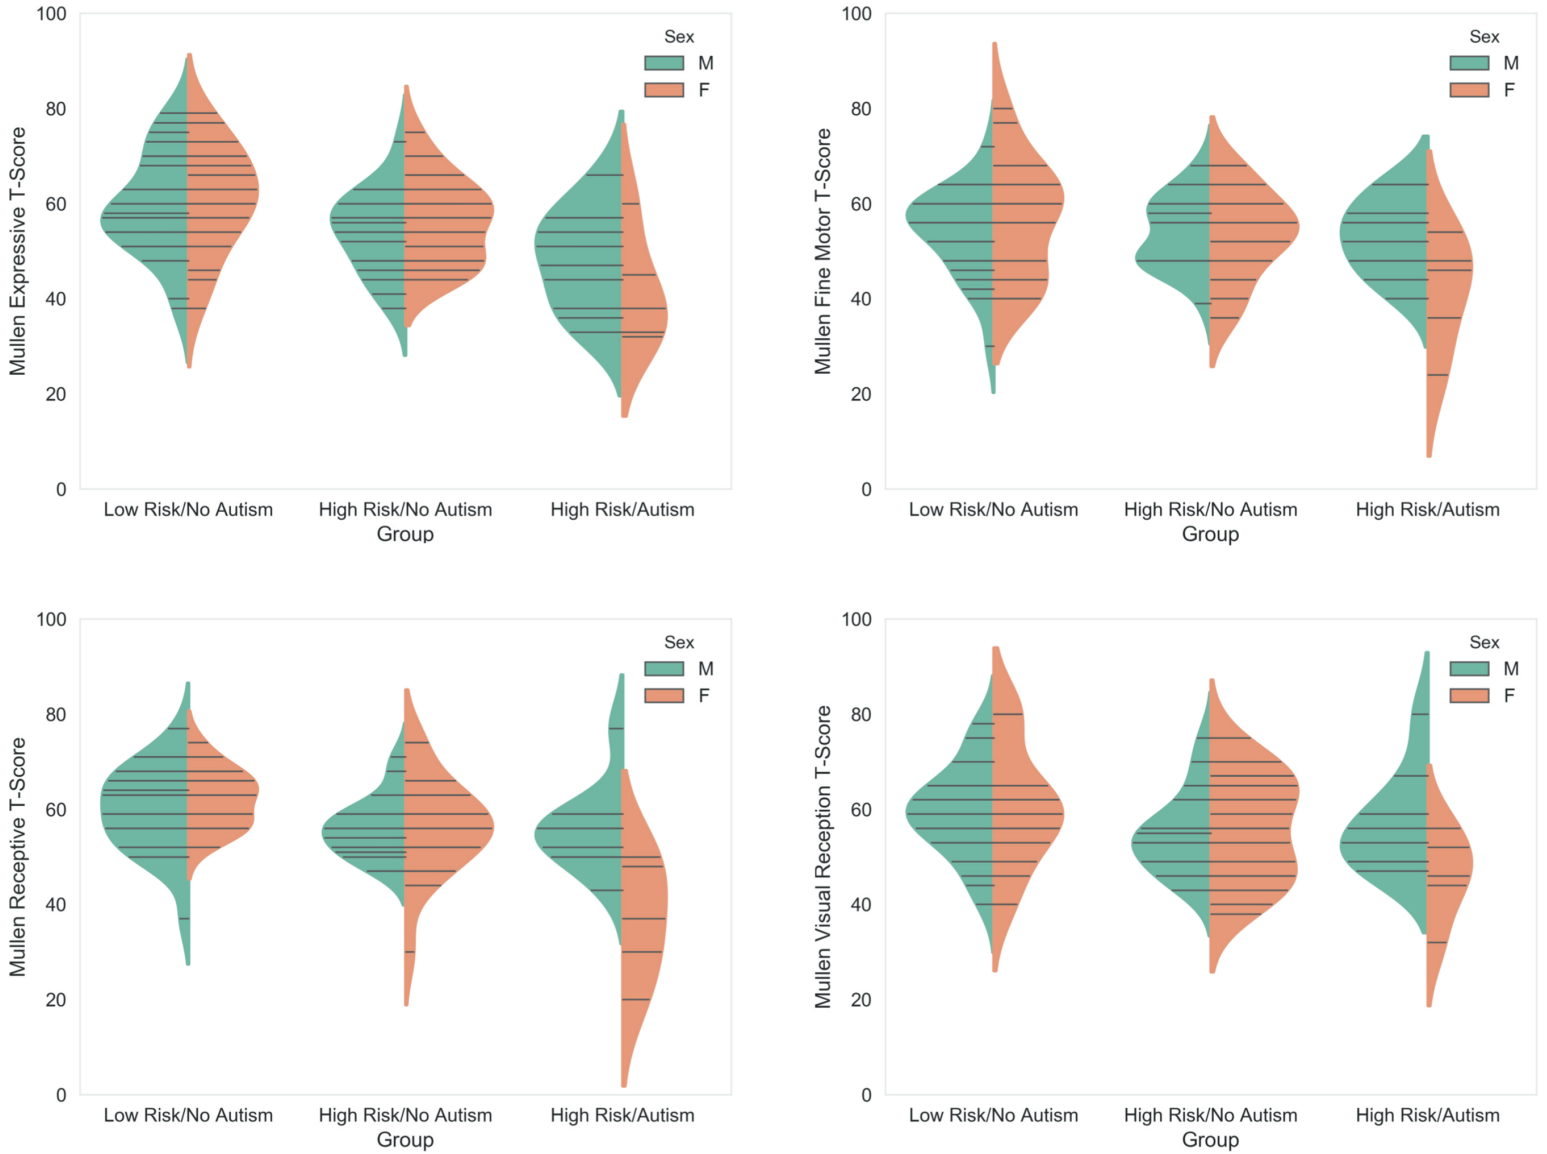

**Figure 1. Mullen Scales of Early Learning T-Scores.** Violin plots of T-scores from each of the 4 subscales (Expressive Language, Receptive Language, Fine motor, and Visual Reception) are shown for each outcome group, divided into males and females. Lines represent individual data points. LR (n: males = 24, females 19), HR-NoASD (n: males 18-19, females 20-21); HR-ASD (n: males 10, females 5).

## Figure 2

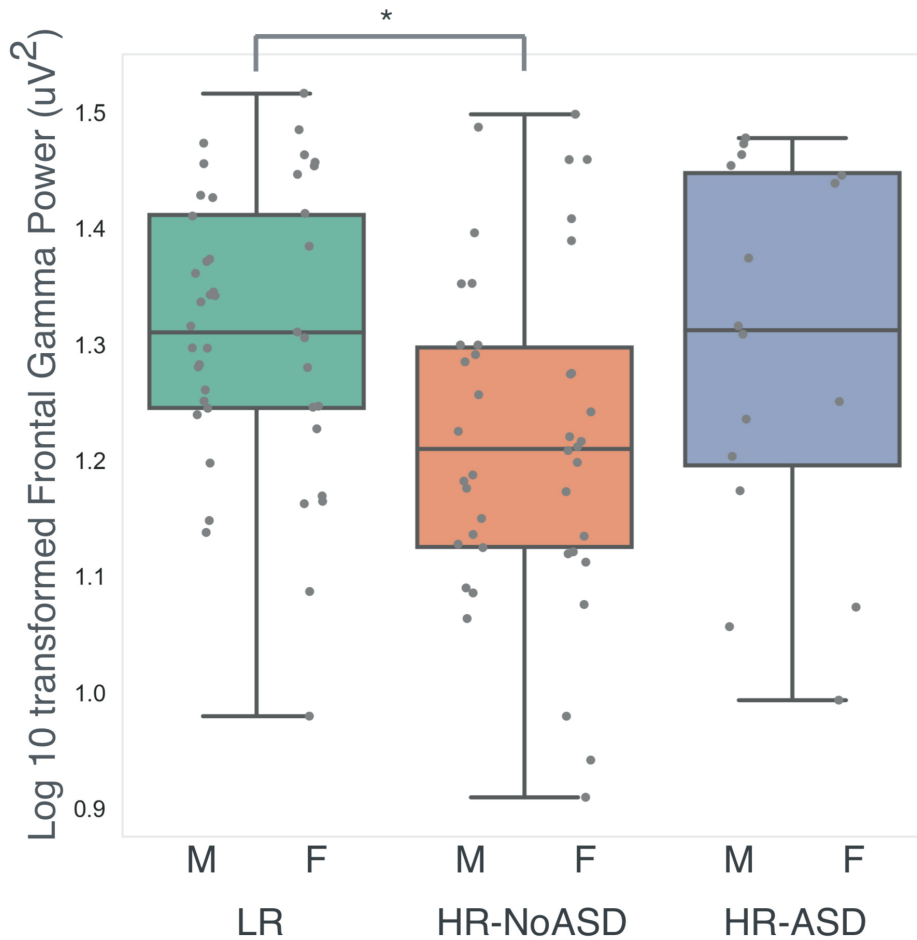

**Figure 2. Frontal Gamma Power reduced in HR-NoASD Group.** Box plots of Frontal Gamma Power are shown for each outcome group. Individual data points for males (left) and females (right) are also shown for each group. Mean values: LR (n=43,  $1.31 \pm 0.12$ ); HR-NoASD (n=42,  $1.22 \pm 0.14$ ); HR-ASD (n = 16,  $1.30 \pm 0.16$ ). Two-way ANOVA test, controlling for head circumference and maternal education, showed main effect of group ( $F_{2,80}=4.73$ ,  $p=0.01$ ) with reduced frontal gamma in HR-NoASD group compared to LR group (Bonferroni,  $p=0.013$ ).

## Figure 3

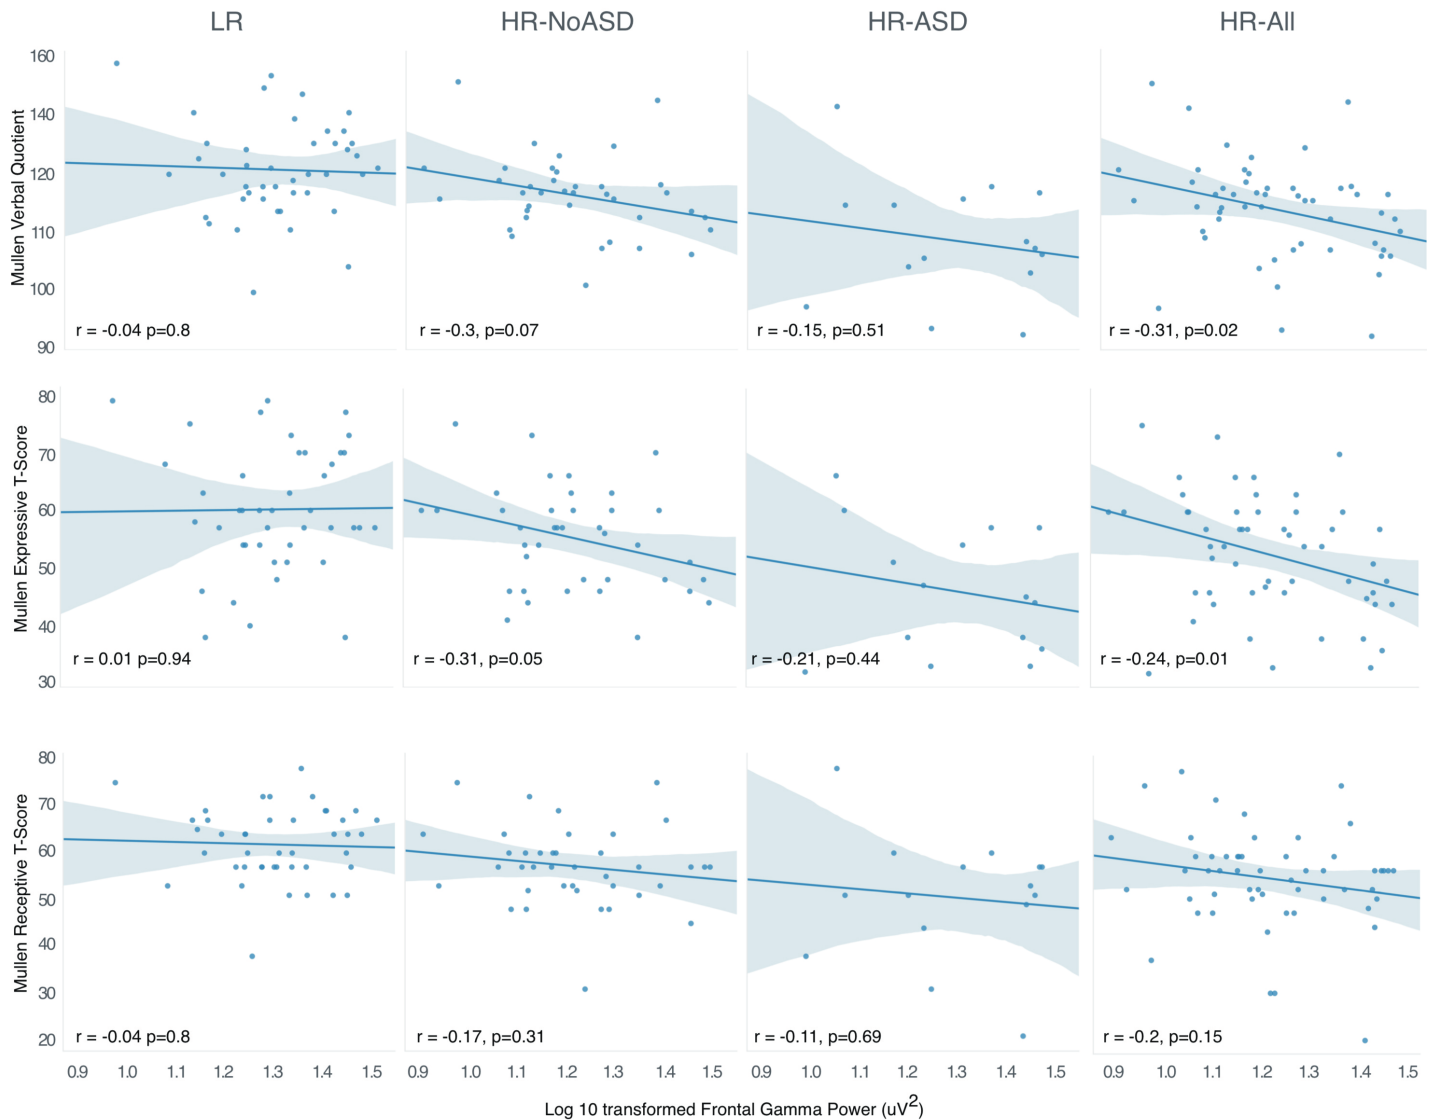

**Figure 3. Frontal Gamma Power and Mullen Scales of Early Learning Language Scores.** Frontal gamma is negatively correlated with the Mullen Verbal Quotient score for high-risk toddlers (HR-ALL), but not low-risk toddlers (LR). When divided into language subscales, this negative correlation was only significant for Expressive, but not Receptive Language T-scores. When further divided into outcome groups, only high-risk toddlers without autism (HR-NoASD) showed significant negative correlation between frontal gamma and expressive language T-scores.

**Table 1. Demographic Information of Sample Participants**

| Characteristic                          | LR<br>n = 43 | HR-NoASD<br>n = 42 | HR - ASD<br>n = 16 | Fisher's Exact Test<br><i>p</i> value |
|-----------------------------------------|--------------|--------------------|--------------------|---------------------------------------|
| <b>Sex</b>                              | 24M, 19F     | 20M, 22F           | 11M, 5F            | <i>p</i> = 0.36                       |
| <b>Maternal Education, <i>n</i> (%)</b> |              |                    |                    | <i>p</i> = 0.01                       |
| Not answered                            | 5 (11.6)     | 1 (2.4)            | 4 (25.0)           |                                       |
| < 4-year college degree                 | 2 (4.7)      | 9 (21.4)           | 3 (18.8)           |                                       |
| 4-year college degree                   | 8 (18.6)     | 7 (16.7)           | 6 (37.5)           |                                       |
| Graduate degree                         | 28 (65.1)    | 25 (59.5)          | 3 (18.8)           |                                       |
| <b>Paternal Education, <i>n</i> (%)</b> |              |                    |                    | <i>p</i> = 0.17                       |
| Not answered                            | 5 (11.6)     | 1 (2.4)            | 5 (16.6)           |                                       |
| < 4-year college degree                 | 3 (7.0)      | 3 (7.1)            | 7 (23.3)           |                                       |
| 4-year college degree                   | 12 (27.9)    | 15 (35.7)          | 10 (33.3)          |                                       |
| Graduate degree                         | 23 (53.5)    | 23 (54.8)          | 8 (26.7)           |                                       |
| <b>Household Income</b>                 |              |                    |                    | 0.67                                  |
| Not answered                            | 7 (16.3)     | 2 (4.8)            | 5 (31.3)           |                                       |
| <\$75,000                               | 5 (11.6)     | 4 (9.5)            | 2 (12.5)           |                                       |
| >\$75,000                               | 31 (72.1)    | 36 (85.7)          | 9 (56.2)           |                                       |
| <b>Race</b>                             |              |                    |                    | 0.07                                  |
| Non-White                               | 6 (14.0)     | 2 (4.8)            | 4 (25.0)           |                                       |
| <b>Ethnicity</b>                        |              |                    |                    | 0.25                                  |
| Hispanic or Latino                      | 2 (4.7)      | 2 (4.8)            | 1 (2.3)            |                                       |

Abbreviations: ASD, autism spectrum disorder; LR, low-risk without ASD; HR-NoASD, high-risk without ASD; HR-ASD, high-risk with ASD;

**Table 2. 24-Month Sample Characteristics**

| Characteristics                       | LR-Negative<br>mean±SD |                    |                    | HR-Negative        |                    |                    | HR-ASD             |                    |                 | p-Value                                     |                                               |                                             |
|---------------------------------------|------------------------|--------------------|--------------------|--------------------|--------------------|--------------------|--------------------|--------------------|-----------------|---------------------------------------------|-----------------------------------------------|---------------------------------------------|
|                                       | Total                  | Male               | Female             | Total              | Male               | Female             | Total              | Male               | Female          | Group                                       | Sex                                           | GroupX<br>Sex                               |
| <b>Head Circumference<sup>†</sup></b> | 49.3±1.5<br>(n=42)     | 50.0±1.1<br>(n=24) | 48.4±1.4<br>(n=18) | 49.2±1.6<br>(n=41) | 49.8±1.8<br>(n=20) | 48.5±1.3<br>(n=21) | 49.4±1.4<br>(n=16) | 49.6±1.6<br>(n=11) | 49±0.7<br>(n=5) | <i>df</i> (2,93)<br><i>F</i> =0.06<br>0.946 | <i>df</i> (1,93)<br><i>F</i> =12.68<br>0.0006 | <i>df</i> (2,93)<br><i>F</i> =0.70<br>0.499 |
| <b>Mullen T-Scores<sup>‡</sup></b>    | n = 43                 | n = 24             | n = 19             | n = 38-39          | n = 18-19          | n = 20-21          | n = 15             | n = 10             | n = 5           | <i>df</i> (2,78)                            | <i>df</i> (1,78)                              | <i>df</i> (2,78)                            |
| Expressive Language                   | 60.2±10.8              | 59.5±10.8          | 61.0±11.1          | 55.2±8.8           | 54.1±8.8           | 56.2±8.9           | 46.1±11.0          | 48.3±10.6          | 41.6±11.5       | <i>F</i> =4.35<br>0.016                     | <i>F</i> =0.85<br>0.36                        | <i>F</i> =0.03<br>0.98                      |
| Receptive Language                    | 60.8±7.8               | 59.7±9.0           | 62.2±6.0           | 56.2±8.4           | 56.1±6.4           | 56.3±10.1          | 49.5±13.4          | 55.8±8.9           | 37±12.5         | <i>F</i> =10.75<br>0.0001                   | <i>F</i> =5.33<br>0.02                        | <i>F</i> =6.26<br>0.003                     |
| Fine Motor                            | 55.1±10.6              | 54.1±9.1           | 56.5±12.3          | 53.5±8.5           | 53.6±7.6           | 53.3±9.4           | 49.2±10.6          | 53±8.1             | 41.6±11.8       | <i>F</i> =1.31<br>0.28                      | <i>F</i> =0.47<br>0.49                        | <i>F</i> =1.06<br>0.35                      |
| Visual Reception                      | 59.9±10.6              | 59.5±9.5           | 60.5±12.6          | 55.4±9.9           | 54.9±8.6           | 55.8±11.1          | 53.2±10.9          | 56.8±10.3          | 46±9.2          | <i>F</i> =1.27<br>0.29                      | <i>F</i> =0.13<br>0.71                        | <i>F</i> =0.79<br>0.46                      |
| <b>ADOS<sup>§</sup></b>               | n = 36                 | n = 19             | n = 14             | n = 41             | n = 20             | n = 21             | n = 16             | n = 11             | n = 5           |                                             |                                               |                                             |
| 24m Severity Score                    | 1.63±0.96              | 1.58±0.9           | 1.29±0.61          | 2.02±1.25          | 2.35±0.61          | 1.71±0.78          | 4.56±2.58          | 3.55±2.11          | 6.8±2.17        | <i>F</i> =30.4<br><0.0001                   | <i>F</i> =3.35<br>0.07                        | <i>F</i> =8.69<br>0.0004                    |

Abbreviations: ASD, autism spectrum disorder; LR-Negative, low-risk without ASD; HR-Negative, high-risk without ASD; HR-ASD, high-risk with ASD; ADOS, Autism Diagnostic Observation Schedule

<sup>†</sup> Two-way ANOVA

<sup>‡</sup> Two-way ANOVA with Maternal Education as covariate

<sup>§</sup> ANCOVA with MSEL Expressive and Receptive Language T-scores as covariates

**Table 3. Effect of 24m Frontal Gamma Power on MSEL Expressive T-Score †**

| Model 3-way interactions |                      | P Value |
|--------------------------|----------------------|---------|
| Model 1                  | sex x risk x gamma   | 0.137   |
| Model 2                  | sex x HR-neg x gamma | 0.08    |
|                          | sex x HR-ASD x gamma | 0.414   |
| Model 3                  | sex x HR-neg x gamma | 0.22    |
|                          | sex x HR-ASD x gamma | 0.68    |

  

| MSEL Expressive Language T-Score vs Frontal Gamma |                        |                    |                  |
|---------------------------------------------------|------------------------|--------------------|------------------|
|                                                   | Slope (95% CI)         | Unadjusted P Value | Adjusted P Value |
| <b>Model 1</b>                                    |                        |                    |                  |
| Low Risk                                          | -13.3 (-42.1 to 15.4)  | 0.359              | 0.359            |
| Males                                             | -35.2 (-81.4 to 11.0)  | 0.13               | 0.17             |
| Females                                           | 12.4 (-19.4 to 44.2)   | 0.43               | 0.43             |
| High Risk                                         | -25.5(-43.9 to -7.03)  | 0.007              | 0.014            |
| Males                                             | -24.1(-51.5 to 3.2)    | 0.08               | 0.160            |
| Females                                           | -27.1 (-50.9 to -3.3)  | 0.03               | 0.12             |
| <b>Model 2</b>                                    |                        |                    |                  |
| LR-Negative                                       | -13.3 (-42.3 to 15.7)  | 0.36               | 0.36             |
| Males                                             | -34.4 (-81.0 to 12.3)  | 0.15               | 0.30             |
| Females                                           | 11.4 (-20.7 to 43.6)   | 0.48               | 0.576            |
| HR-Negative                                       | -14.3 (-37.4 to 8.7)   | 0.22               | 0.33             |
| Males                                             | -4.5 (-43.3 to 34.3)   | 0.82               | 0.820            |
| Females                                           | -23.6 (-49.9 to 2.7)   | 0.08               | 0.24             |
| HR-ASD                                            | -40.1 (-77.6 to -2.6)  | 0.04               | 0.12             |
| Males                                             | -41.2 (-87.7 to 5.2)   | 0.08               | 0.24             |
| Females                                           | -37.1 (-103.7 to 29.4) | 0.27               | 0.41             |
| <b>Model 3 (36 month Expressive T-Score)</b>      |                        |                    |                  |
| LR-Negative                                       | 15.8 (-15.4 to 47.1)   | 0.31               | 0.47             |
| Males                                             | -4.4 (-52.3 to 43.6)   | 0.86               | 0.86             |
| Females                                           | 40.7 (6.3 to 75.0)     | 0.02               | 0.12             |
| HR-Negative                                       | 6.3 (-16.8 to 29.4)    | 0.59               | 0.59             |
| Males                                             | 6.2 (-28.9 to 41.2)    | 0.73               | 0.86             |
| Females                                           | 6.5 (-22.0 to 35.0)    | 0.65               | 0.86             |
| HR-ASD                                            | -33.1 (-70.0 to 0.82)  | 0.06               | 0.18             |
| Males                                             | -42.5 (-88.0 to 3.0)   | 0.07               | 0.21             |
| Females                                           | -17.3 (-74.4 to 39.7)  | 0.54               | 0.86             |

† Results above are from linear regression models in which the outcome variable was MSEL Expressive Language T-Scores. The independent variables were frontal gamma power, sex, and risk (Model 1) or group (Models 2 and 3). Full factor interactions of independent variables were included in the models. Potential confounders - head circumference and maternal education, were included as covariates. Slopes presented are for Frontal Gamma Power and MSEL Expressive T-Score. Both unadjusted and adjusted P Values for multiple comparisons, using False Discovery Rate are presented.
